# Supplementary material for: Reagent Effects on the Activated Partial Thromboplastin Time Clot Waveform Analysis: A Multi-Centre Study
Source: MDPI journal article supplement (doi:10.3390/diagnostics13142447), 2023-07-22
Supplement: s1 [file s1]

**Supplementary table: Site-specific age and gender means  $\pm$  standard deviation (SD) of the CWA parameters from the reference population**

| REAGENT                                   | PATHROMTIN SL |               |      |               |       |               | ACTIN FS |               |    |               |       |               | ACTIN FSL |               |     |               |       |               |
|-------------------------------------------|---------------|---------------|------|---------------|-------|---------------|----------|---------------|----|---------------|-------|---------------|-----------|---------------|-----|---------------|-------|---------------|
|                                           | SKH           |               | SLGC |               | TOTAL |               | HSH      |               | SH |               | TOTAL |               | NUH       |               | SGH |               | TOTAL |               |
| Clot time, sec                            |               |               |      |               |       |               |          |               |    |               |       |               |           |               |     |               |       |               |
| Age                                       | n             |               | n    |               | n     |               | n        |               | n  |               | n     |               | n         |               | n   |               | n     |               |
| <21                                       | 4             | 32.60 ± 5.01  | 33   | 34.20 ± 4.51  | 37    | 34.02 ± 4.52  | 13       | 26.55 ± 1.90  | 0  | -             | 13    | 26.55 ± 1.90  | 5         | 29.54 ± 1.60  | 11  | 29.44 ± 2.43  | 16    | 29.47 ± 2.15  |
| 21 - 30                                   | 22            | 33.79 ± 3.43  | 99   | 33.99 ± 3.77  | 121   | 33.96 ± 3.69  | 21       | 24.92 ± 2.84  | 16 | 26.58 ± 1.92  | 37    | 25.64 ± 2.59  | 39        | 29.22 ± 1.56  | 94  | 29.03 ± 1.70  | 133   | 29.08 ± 1.66  |
| 31 - 40                                   | 29            | 34.16 ± 3.58  | 32   | 32.53 ± 3.46  | 61    | 33.31 ± 3.58  | 22       | 23.33 ± 1.88  | 8  | 27.09 ± 1.83  | 30    | 24.33 ± 2.50  | 59        | 28.94 ± 1.85  | 83  | 29.12 ± 1.91  | 142   | 29.04 ± 1.88  |
| 41 - 50                                   | 12            | 33.23 ± 4.32  | 0    | -             | 12    | 33.23 ± 4.32  | 15       | 24.03 ± 2.21  | 18 | 26.57 ± 2.04  | 33    | 25.42 ± 2.45  | 16        | 28.89 ± 1.47  | 29  | 28.81 ± 2.16  | 45    | 28.84 ± 1.93  |
| 51 - 60                                   | 5             | 32.38 ± 6.96  | 1    | -             | 6     | 31.98 ± 6.30  | 5        | 22.72 ± 2.03  | 1  | -             | 6     | 22.88 ± 1.86  | 17        | 27.91 ± 1.97  | 16  | 28.50 ± 2.14  | 33    | 28.19 ± 2.04  |
| >60                                       | 4             | -             | 0    | -             | 0     | -             | -        | -             | 0  | -             | 0     | -             | 4         | 27.93 ± 1.02  | 9   | 27.83 ± 2.52  | 13    | 27.86 ± 2.12  |
| Male                                      | 23            | 33.64 ± 4.38  | 81   | 33.78 ± 3.83  | 104   | 33.75 ± 3.93  | 34       | 25.45 ± 2.48  | 12 | 26.59 ± 1.31  | 46    | 25.75 ± 2.28  | 30        | 28.70 ± 1.92  | 96  | 29.00 ± 1.95  | 126   | 28.93 ± 1.94  |
| Female                                    | 50            | 33.61 ± 3.78  | 86   | 33.73 ± 3.95  | 136   | 33.68 ± 3.88  | 43       | 23.65 ± 2.24  | 31 | 26.60 ± 2.17  | 74    | 24.89 ± 2.64  | 110       | 28.93 ± 1.71  | 156 | 28.90 ± 1.90  | 266   | 28.91 ± 1.82  |
| Min 1, dOD sec <sup>-1</sup>              |               |               |      |               |       |               |          |               |    |               |       |               |           |               |     |               |       |               |
| <21                                       | 4             | 2.675 ± 0.854 | 33   | 2.644 ± 0.638 | 37    | 2.647 ± 0.650 | 13       | 3.715 ± 0.775 | 0  | -             | 13    | 3.715 ± 0.775 | 5         | 4.019 ± 0.540 | 11  | 4.563 ± 1.153 | 16    | 4.393 ± 1.016 |
| 21 - 30                                   | 22            | 2.712 ± 0.564 | 99   | 2.813 ± 0.584 | 121   | 2.795 ± 0.579 | 21       | 4.225 ± 0.792 | 16 | 4.388 ± 0.660 | 37    | 4.295 ± 0.733 | 39        | 4.479 ± 1.063 | 94  | 4.556 ± 0.903 | 133   | 4.534 ± 0.949 |
| 31 - 40                                   | 29            | 2.899 ± 0.652 | 32   | 2.955 ± 0.620 | 61    | 2.928 ± 0.631 | 22       | 4.472 ± 0.752 | 8  | 4.514 ± 0.803 | 30    | 4.483 ± 0.752 | 59        | 4.863 ± 0.797 | 83  | 4.610 ± 0.797 | 142   | 4.715 ± 0.804 |
| 41 - 50                                   | 12            | 3.076 ± 0.486 | 0    | -             | 12    | 3.076 ± 0.486 | 15       | 4.636 ± 0.433 | 18 | 4.664 ± 0.844 | 33    | 4.651 ± 0.679 | 16        | 5.011 ± 0.848 | 29  | 4.967 ± 0.738 | 45    | 4.983 ± 0.769 |
| 51 - 60                                   | 5             | 3.468 ± 0.367 | 1    | -             | 6     | 3.415 ± 0.353 | 5        | 5.325 ± 0.848 | 1  | -             | 6     | 5.457 ± 0.824 | 17        | 4.935 ± 0.607 | 16  | 5.375 ± 0.757 | 33    | 5.149 ± 0.709 |
| >60                                       | 4             | -             | 0    | -             | 0     | -             | -        | -             | 0  | -             | 0     | -             | 4         | 5.604 ± 1.259 | 9   | 5.241 ± 0.881 | 13    | 5.353 ± 0.972 |
| Male                                      | 23            | 2.706 ± 0.505 | 81   | 2.594 ± 0.590 | 104   | 2.619 ± 0.572 | 34       | 4.090 ± 0.789 | 12 | 4.090 ± 0.709 | 46    | 4.090 ± 0.761 | 30        | 4.361 ± 0.936 | 96  | 4.433 ± 0.833 | 126   | 4.416 ± 0.855 |
| Female                                    | 50            | 2.987 ± 0.639 | 86   | 2.996 ± 0.558 | 136   | 2.992 ± 0.587 | 43       | 4.557 ± 0.774 | 31 | 4.752 ± 0.752 | 74    | 4.639 ± 0.765 | 110       | 4.885 ± 0.863 | 156 | 4.856 ± 0.879 | 266   | 4.868 ± 0.871 |
| Time of Min 1 (Tmin1), sec                |               |               |      |               |       |               |          |               |    |               |       |               |           |               |     |               |       |               |
| <21                                       | 4             | 32.40 ± 4.92  | 33   | 34.05 ± 4.32  | 37    | 33.87 ± 4.35  | 13       | 26.44 ± 1.85  | 0  | -             | 13    | 26.44 ± 1.85  | 5         | 29.22 ± 1.47  | 11  | 29.18 ± 2.23  | 16    | 29.19 ± 1.97  |
| 21 - 30                                   | 22            | 33.67 ± 3.33  | 99   | 33.89 ± 3.66  | 121   | 33.85 ± 3.59  | 21       | 24.88 ± 2.78  | 16 | 26.78 ± 1.84  | 37    | 25.70 ± 2.57  | 39        | 28.97 ± 1.48  | 94  | 28.77 ± 1.61  | 133   | 28.83 ± 1.57  |
| 31 - 40                                   | 29            | 34.00 ± 3.46  | 32   | 32.46 ± 3.36  | 61    | 33.19 ± 3.47  | 22       | 23.30 ± 1.82  | 8  | 26.94 ± 1.76  | 30    | 24.27 ± 2.41  | 59        | 28.69 ± 1.74  | 83  | 28.84 ± 1.80  | 142   | 28.78 ± 1.77  |
| 41 - 50                                   | 12            | 33.12 ± 4.22  | 0    | -             | 12    | 33.12 ± 4.22  | 15       | 24.01 ± 2.17  | 18 | 26.12 ± 1.93  | 33    | 25.16 ± 2.27  | 16        | 28.63 ± 1.36  | 29  | 28.56 ± 2.04  | 45    | 28.58 ± 1.81  |
| 51 - 60                                   | 5             | 32.22 ± 6.74  | 1    | -             | 6     | 31.87 ± 6.09  | 5        | 22.74 ± 2.06  | 1  | -             | 6     | 22.90 ± 1.88  | 17        | 27.74 ± 1.88  | 16  | 28.23 ± 2.00  | 33    | 27.98 ± 1.92  |
| >60                                       | 4             | -             | 0    | -             | 0     | -             | -        | -             | 0  | -             | 0     | -             | 4         | 27.70 ± 1.00  | 9   | 27.67 ± 2.45  | 13    | 27.68 ± 2.06  |
| Male                                      | 23            | 33.52 ± 04.24 | 81   | 33.71 ± 3.72  | 104   | 33.66 ± 3.82  | 34       | 25.38 ± 2.42  | 12 | 26.48 ± 1.23  | 46    | 25.67 ± 2.21  | 30        | 28.48 ± 1.81  | 96  | 28.75 ± 1.85  | 126   | 28.69 ± 1.84  |
| Female                                    | 50            | 33.46 ± 3.69  | 86   | 33.60 ± 3.82  | 136   | 33.55 ± 3.76  | 43       | 23.63 ± 2.19  | 31 | 26.45 ± 2.10  | 74    | 24.81 ± 2.56  | 110       | 28.68 ± 1.61  | 156 | 28.64 ± 1.78  | 266   | 28.65 ± 1.71  |
| Min 2, dOD <sup>2</sup> sec <sup>-2</sup> |               |               |      |               |       |               |          |               |    |               |       |               |           |               |     |               |       |               |
| <21                                       | 4             | 0.444 ± 0.136 | 33   | 0.439 ± 0.103 | 37    | 0.439 ± 0.105 | 13       | 0.600 ± 0.123 | 0  | -             | 13    | 0.600 ± 0.123 | 5         | 0.631 ± 0.082 | 11  | 0.723 ± 0.193 | 16    | 0.694 ± 0.169 |
| 21 - 30                                   | 22            | 0.452 ± 0.090 | 99   | 0.469 ± 0.097 | 121   | 0.466 ± 0.096 | 21       | 0.692 ± 0.135 | 16 | 0.708 ± 0.105 | 37    | 0.699 ± 0.121 | 39        | 0.712 ± 0.171 | 94  | 0.719 ± 0.146 | 133   | 0.717 ± 0.153 |
| 31 - 40                                   | 29            | 0.480 ± 0.106 | 32   | 0.496 ± 0.104 | 61    | 0.488 ± 0.105 | 22       | 0.741 ± 0.131 | 8  | 0.727 ± 0.130 | 30    | 0.737 ± 0.128 | 59        | 0.769 ± 0.126 | 83  | 0.726 ± 0.130 | 142   | 0.744 ± 0.130 |
| 41 - 50                                   | 12            | 0.515 ± 0.081 | 0    | -             | 12    | 0.515 ± 0.081 | 15       | 0.766 ± 0.072 | 18 | 0.752 ± 0.132 | 33    | 0.758 ± 0.107 | 16        | 0.794 ± 0.122 | 29  | 0.790 ± 0.128 | 45    | 0.791 ± 0.125 |
| 51 - 60                                   | 5             | 0.581 ± 0.071 | 1    | -             | 6     | 0.573 ± 0.067 | 5        | 0.884 ± 0.122 | 1  | -             | 6     | 0.906 ± 0.122 | 17        | 0.796 ± 0.090 | 16  | 0.852 ± 0.134 | 33    | 0.823 ± 0.115 |
| >60                                       | 4             | -             | 0    | -             | 0     | -             | -        | -             | 0  | -             | 0     | -             | 4         | 0.905 ± 0.200 | 9   | 0.844 ± 0.148 | 13    | 0.863 ± 0.159 |
| Male                                      | 23            | 0.449 ± 0.083 | 81   | 0.432 ± 0.099 | 104   | 0.436 ± 0.096 | 34       | 0.670 ± 0.133 | 12 | 0.667 ± 0.118 | 46    | 0.669 ± 0.128 | 30        | 0.700 ± 0.151 | 96  | 0.703 ± 0.138 | 126   | 0.702 ± 0.140 |
| Female                                    | 50            | 0.498 ± 0.104 | 86   | 0.500 ± 0.092 | 136   | 0.499 ± 0.096 | 43       | 0.752 ± 0.132 | 31 | 0.764 ± 0.121 | 74    | 0.757 ± 0.127 | 110       | 0.774 ± 0.137 | 156 | 0.767 ± 0.145 | 266   | 0.770 ± 0.142 |
| Time of Min 2 (Tmin2), sec                |               |               |      |               |       |               |          |               |    |               |       |               |           |               |     |               |       |               |
| <21                                       | 4             | 28.58 ± 4.85  | 33   | 30.27 ± 4.17  | 37    | 30.08 ± 4.21  | 13       | 22.62 ± 1.74  | 0  | -             | 13    | 22.62 ± 1.74  | 5         | 25.26 ± 1.31  | 11  | 25.24 ± 2.00  | 16    | 25.24 ± 1.77  |
| 21 - 30                                   | 22            | 29.90 ± 3.22  | 99   | 30.13 ± 3.52  | 121   | 30.09 ± 11.93 | 21       | 21.12 ± 2.67  | 16 | 22.98 ± 1.72  | 37    | 21.92 ± 2.46  | 39        | 25.08 ± 1.37  | 94  | 24.84 ± 1.48  | 133   | 24.91 ± 1.45  |
| 31 - 40                                   | 29            | 30.21 ± 3.33  | 32   | 28.73 ± 10.64 | 61    | 29.43 ± 3.35  | 22       | 19.62 ± 1.68  | 8  | 23.11 ± 1.62  | 30    | 20.55 ± 2.27  | 59        | 24.76 ± 1.57  | 83  | 24.90 ± 1.65  | 142   | 24.84 ± 1.61  |
| 41 - 50                                   | 12            | 29.36 ± 4.10  | 0    | -             | 12    | 29.36 ± 4.10  | 15       | 20.33 ± 2.10  | 18 | 22.28 ± 1.81  | 33    | 21.39 ± 2.15  | 16        | 24.73 ± 1.22  | 29  | 24.65 ± 1.83  | 45    | 24.68 ± 1.63  |
| 51 - 60                                   | 5             | 28.48 ± 6.50  | 1    | -             | 6     | 28.13 ± 5.88  | 5        | 19.10 ± 1.91  | 1  | -             | 6     | 19.25 ± 1.75  | 17        | 23.93 ± 1.73  | 16  | 24.31 ± 1.80  | 33    | 24.11 ± 1.74  |
| >60                                       | 4             | -             | 0    | -             | 0     | -             | -        | -             | 0  | -             | 0     | -             | 4         | 23.88 ± 0.96  | 9   | 23.84 ± 2.33  | 13    | 23.85 ± 1.96  |
| Male                                      | 23            | 29.73 ± 4.09  | 81   | 29.95 ± 3.59  | 104   | 29.90 ± 3.68  | 34       | 21.64 ± 2.28  | 12 | 22.71 ± 1.12  | 46    | 21.92 ± 2.09  | 30        | 24.63 ± 1.63  | 96  | 24.83 ± 1.69  | 126   | 24.79 ± 1.67  |
| Female                                    | 50            | 29.70 ± 3.57  | 86   | 29.84 ± 3.68  | 136   | 28.79 ± 3.63  | 43       | 19.92 ± 2.08  | 31 | 22.61 ± 1.98  | 74    | 21.05 ± 2.43  | 110       | 24.77 ± 1.47  | 156 | 24.70 ± 1.63  | 266   | 24.73 ± 1.56  |

| Max 2, dOD <sup>2</sup> sec <sup>-2</sup> |    |               |    |               |     |               |    |               |    |               |    |               |     |               |     |               |     |               |
|-------------------------------------------|----|---------------|----|---------------|-----|---------------|----|---------------|----|---------------|----|---------------|-----|---------------|-----|---------------|-----|---------------|
| <21                                       | 4  | 0.344 ± 0.109 | 33 | 0.345 ± 0.085 | 37  | 0.345 ± 0.086 | 13 | 0.513 ± 0.107 | 0  | -             | 13 | 0.513 ± 0.107 | 5   | 0.499 ± 0.064 | 11  | 0.586 ± 0.174 | 16  | 0.559 ± 0.152 |
| 21 - 30                                   | 22 | 0.357 ± 0.076 | 99 | 0.378 ± 0.084 | 121 | 0.374 ± 0.083 | 21 | 0.603 ± 0.123 | 16 | 0.614 ± 0.095 | 37 | 0.608 ± 0.111 | 39  | 0.582 ± 0.146 | 94  | 0.584 ± 0.124 | 133 | 0.584 ± 0.130 |
| 31 - 40                                   | 29 | 0.380 ± 0.090 | 32 | 0.403 ± 0.093 | 61  | 0.392 ± 0.091 | 22 | 0.656 ± 0.125 | 8  | 0.631 ± 0.121 | 30 | 0.649 ± 0.122 | 59  | 0.626 ± 0.108 | 83  | 0.591 ± 0.113 | 142 | 0.606 ± 0.112 |
| 41 - 50                                   | 12 | 0.415 ± 0.072 | 0  | -             | 12  | 0.415 ± 0.072 | 15 | 0.677 ± 0.070 | 18 | 0.649 ± 0.118 | 33 | 0.662 ± 0.099 | 16  | 0.644 ± 0.098 | 29  | 0.648 ± 0.122 | 45  | 0.647 ± 0.113 |
| 51 - 60                                   | 5  | 0.472 ± 0.084 | 1  | -             | 6   | 0.466 ± 0.076 | 5  | 0.793 ± 0.109 | 1  | -             | 6  | 0.811 ± 0.108 | 17  | 0.664 ± 0.075 | 16  | 0.691 ± 0.122 | 33  | 0.677 ± 0.100 |
| >60                                       | 4  | -             | 0  | -             | 0   | -             | 0  | -             | 0  | -             | 0  | -             | 4   | 0.741 ± 0.158 | 9   | 0.708 ± 0.128 | 13  | 0.718 ± 0.132 |
| Male                                      | 23 | 0.354 ± 0.075 | 81 | 0.346 ± 0.087 | 104 | 0.348 ± 0.084 | 34 | 0.583 ± 0.125 | 12 | 0.579 ± 0.114 | 46 | 0.582 ± 0.121 | 30  | 0.576 ± 0.130 | 96  | 0.574 ± 0.120 | 126 | 0.574 ± 0.122 |
| Female                                    | 50 | 0.396 ± 0.089 | 86 | 0.403 ± 0.080 | 136 | 0.401 ± 0.083 | 43 | 0.664 ± 0.124 | 31 | 0.661 ± 0.109 | 74 | 0.663 ± 0.117 | 110 | 0.631 ± 0.116 | 156 | 0.625 ± 0.127 | 266 | 0.628 ± 0.123 |
| Time of Max 2 (Tmax2), sec                |    |               |    |               |     |               |    |               |    |               |    |               |     |               |     |               |     |               |
| <21                                       | 4  | 36.13 ± 5.04  | 33 | 37.83 ± 4.58  | 37  | 37.64 ± 5.49  | 13 | 30.25 ± 1.98  | 0  | -             | 13 | 30.25 ± 1.98  | 5   | 33.22 ± 1.67  | 11  | 33.12 ± 2.53  | 16  | 33.15 ± 2.24  |
| 21 - 30                                   | 22 | 37.41 ± 3.49  | 99 | 37.63 ± 3.86  | 121 | 37.59 ± 3.78  | 21 | 28.61 ± 2.90  | 16 | 30.62 ± 2.01  | 37 | 29.48 ± 2.71  | 39  | 32.87 ± 1.65  | 94  | 32.34 ± 1.79  | 133 | 32.75 ± 1.74  |
| 31 - 40                                   | 29 | 37.80 ± 3.68  | 32 | 36.14 ± 3.52  | 61  | 36.93 ± 3.66  | 22 | 26.96 ± 1.96  | 8  | 30.79 ± 1.94  | 30 | 27.98 ± 2.58  | 59  | 32.62 ± 1.96  | 83  | 32.81 ± 2.01  | 142 | 32.73 ± 1.99  |
| 41 - 50                                   | 12 | 36.83 ± 4.39  | 0  | -             | 12  | 36.83 ± 4.39  | 15 | 27.68 ± 2.28  | 18 | 29.95 ± 2.12  | 33 | 28.92 ± 2.45  | 16  | 32.52 ± 1.52  | 29  | 32.47 ± 2.29  | 45  | 32.48 ± 2.03  |
| 51 - 60                                   | 5  | 36.00 ± 7.05  | 1  | -             | 6   | 35.62 ± 6.38  | 5  | 26.34 ± 2.18  | 1  | -             | 6  | 26.50 ± 1.99  | 17  | 32.04 ± 2.80  | 16  | 32.16 ± 2.24  | 33  | 32.10 ± 2.50  |
| >60                                       | 4  | -             | 0  | -             | 0   | -             | 0  | -             | 0  | -             | 0  | -             | 4   | 31.50 ± 1.02  | 9   | 31.48 ± 2.63  | 13  | 32.49 ± 2.20  |
| Male                                      | 23 | 37.29 ± 4.47  | 81 | 37.42 ± 3.91  | 104 | 37.39 ± 4.02  | 34 | 29.12 ± 2.57  | 12 | 30.26 ± 1.43  | 46 | 29.42 ± 2.37  | 30  | 32.62 ± 2.39  | 96  | 32.67 ± 2.06  | 126 | 32.66 ± 2.13  |
| Female                                    | 50 | 37.22 ± 3.85  | 86 | 37.34 ± 4.04  | 136 | 37.30 ± 3.95  | 43 | 27.31 ± 2.31  | 31 | 30.31 ± 2.28  | 74 | 28.56 ± 2.72  | 110 | 32.59 ± 1.79  | 156 | 32.58 ± 1.99  | 266 | 32.58 ± 1.91  |
